# Supplementary material
Source: PubMed Central journal article supplement (PMC3937575)
Supplement: 97320630010052S1.pdf [file 97320630010052S1.pdf]

## Supplementary material:

**Table 1:** Enrichment Factor and Area Under Curve of HIV-1 Protease DUD Database Virtual Screening using AutoDock. The best EF1% and AUC was indicated by bold text.

| HIV-1 Condition                           | Protease | Macromolecule | Grid (units) | Box       | Maximum Evaluations | Number of Energy | EF 1%        | EF 10% | EF 20%        | AUC    |
|-------------------------------------------|----------|---------------|--------------|-----------|---------------------|------------------|--------------|--------|---------------|--------|
| Without water molecule on binding site    |          |               | 50x50x50     |           | 250.000             |                  | 0            | 1,45   | 1,53          | 0.6551 |
|                                           |          |               |              |           | 1.000.000           |                  | 6,45         | 1,77   | 1,53          | 0.6152 |
|                                           |          |               | 60x60x60     | 250.000   |                     | 1,61             | 1,13         | 0,81   | 0.4492        |        |
|                                           |          |               |              | 1.000.000 |                     | 1,61             | 1,45         | 1,45   | 0.5574        |        |
| Retaining water molecules on binding site |          |               | 50x50x50     |           | 250.000             |                  | 3,23         | 2,74   | 1,61          | 0.5654 |
|                                           |          |               |              |           | 1.000.000           |                  | <b>11,29</b> | 3,55   | 2,34          | 0.6992 |
|                                           |          |               | 60x60x60     | 250.000   |                     | 1,61             | 3,23         | 2,66   | <b>0,7275</b> |        |
|                                           |          |               |              | 1.000.000 |                     | 1,61             | 1,13         | 1,21   | 0,6055        |        |

**Table 2:** Top ten compounds of HIV-1 Protease virtual screening result using AutoDock

| Rank | Name                                                             | $\Delta G$ (kcal/mol) | N | SD   | CV (%) | Plant(s) Source                                                                                                                                                                                                                                                                                                                              |
|------|------------------------------------------------------------------|-----------------------|---|------|--------|----------------------------------------------------------------------------------------------------------------------------------------------------------------------------------------------------------------------------------------------------------------------------------------------------------------------------------------------|
| 1    | 8-Hydroxyapigenin (2'',4''-disulfatoglucuronide)                 | -18,74                | 5 | 2,89 | 15,41  | <i>Helicteres isora</i>                                                                                                                                                                                                                                                                                                                      |
| 2    | Isoscutellarein 4'-methyl ether 8-(2'',4''-disulfatoglucuronide) | -17,83                | 5 | 1,20 | 6,72   | <i>Helicteres isora</i>                                                                                                                                                                                                                                                                                                                      |
| 3    | Amaranthin                                                       | -17,72                | 5 | 1,58 | 8,91   | <i>Amaranthus caudatus</i> , <i>Amaranthus tricolor</i> , <i>Celosia argentea</i> var.cristata (L.) Kuntze, <i>Celosia argentea</i> var.plumosa (Burvenich) Voss, <i>Celosia cristata</i> , <i>Atriplex hortensis</i> , <i>Chenopodium amaranticolor</i>                                                                                     |
| 4    | Torvanol A                                                       | -14,58                | 5 | 0,59 | 4,04   | <i>Solanum torvum</i>                                                                                                                                                                                                                                                                                                                        |
| 5    | Ursonic acid                                                     | -12,46                | 5 | 0,03 | 0,28   | <i>Angelica ursina</i> Maxim, <i>Cordia multispicata</i> , <i>Myrica rubra</i> , <i>Lantana camara</i> LINN.                                                                                                                                                                                                                                 |
| 6    | 5-Carboxypyranocyanidin 3-O-(6''-O-malonyl-beta-glucopyranoside) | -12,39                | 4 | 0,35 | 2,82   | <i>Allium cepa</i>                                                                                                                                                                                                                                                                                                                           |
| 7    | Oleoside                                                         | -12,04                | 5 | 0,46 | 3,79   | <i>Chionanthus retusus</i> Lindl.& Paxton, <i>Forestiera acuminata</i> (Michx.) Poir., <i>Fraxinus</i> sp., <i>Jasminum</i> sp., <i>Ligustrum</i> sp., <i>Nestegis sandwicensis</i> (Gray) O.& I.Deg.& Johnson, <i>Olea</i> sp., <i>Osmanthus</i> sp., <i>Phillyrea latifolia</i> L., <i>Picconia excelsa</i> (Aiton) DC., <i>Syringa</i> sp |
| 8    | Jacoumaric acid                                                  | -11,95                | 4 | 0,06 | 0,47   | <i>Jacaranda caucana</i> , <i>Psidium guajava</i>                                                                                                                                                                                                                                                                                            |
| 9    | Platanic acid                                                    | -11,91                | 5 | 0,19 | 1,56   | <i>Platanus occidentalis</i>                                                                                                                                                                                                                                                                                                                 |
| 10   | 5-Carboxypyranocyanidin 3-O-beta-glucopyranoside                 | -11,79                | 3 | 0,55 | 4,63   | <i>Allium cepa</i>                                                                                                                                                                                                                                                                                                                           |
